# Supplementary material for: Work factors facilitating working beyond state pension age: Prospective cohort study with register follow-up
Source: PubMed Central journal article supplement (PMC7801141; doi:10.5271/sjweh.3904), 2020-12-16
Supplement: SJWEH-47-15-S001.pdf [file SJWEH-47-15-S001.pdf]

## Work factors facilitating working beyond state pension age: Prospective cohort study with register follow-up <sup>1</sup>

by Lars L Andersen, PhD,<sup>2</sup> Sannie V Thorsen, PhD, Mona Larsen, PhD, Emil Sundstrup, PhD, Cécile RL Boot, PhD, Reiner Rugulies, PhD

1. *Supplementary material*

2. *Correspondence to: Lars L Andersen, National Research Centre for the Working Environment, Lersø Parkalle 105, DK-2100, Copenhagen, Denmark. [E-mail: lla@nfa.dk]*

**Table S1.** Specific questions and response categories

| Predictor                     | Question                                                                                                                             | Response categories                                                                                  |
|-------------------------------|--------------------------------------------------------------------------------------------------------------------------------------|------------------------------------------------------------------------------------------------------|
| Influence                     | Do you have a large degree of influence concerning your work?                                                                        | Always; Often; Sometimes; Rarely; Never/Almost never                                                 |
| Workpace                      | Do you have to work very fast?                                                                                                       | Always; Often; Sometimes; Rarely; Never/Almost never                                                 |
| Time to tasks                 | How often do you not have time to complete all your work tasks?                                                                      | Always; Often; Sometimes; Rarely; Never/Almost never                                                 |
| Information about decisions   | At your place at work, are you informed well in advance concerning for example important decisions, changes, or plans for the future | To a very high degree; To a high degree; To some degree; To a slight degree; To a very slight degree |
| information to do well        | Do you receive all the information you need in order to do your work well?                                                           | To a very high degree; To a high degree; To some degree; To a slight degree; To a very slight degree |
| recognition from management   | Is your work recognized and appreciated by the management?                                                                           | To a very high degree; To a high degree; To some degree; To a slight degree; To a very slight degree |
| Possibilities for development | Do you have the possibility of learning new things through your work?                                                                | To a very high degree; To a high degree; To some degree; To a slight degree; To a very slight degree |

**Table S2.** Sex-stratified analyses of Model 2 of Table 2. Association between physical and psychosocial work factors and working beyond state pension age for women and men, respectively. The prevalence ratios (PR) represent the highest value of each scale (reference: the lowest value), except for workpace which is reversed.

| Work factors                 | PR (95% CI)        |                    |
|------------------------------|--------------------|--------------------|
|                              | Women              | Men                |
|                              | Model 2**          | Model 2**          |
| <i>Physical</i>              |                    |                    |
| Higher physical work demands | 0.52 (0.37 - 0.71) | 0.78 (0.63 - 0.96) |
| <i>Psychosocial</i>          |                    |                    |
| Influence at work            | 1.41 (1.01 - 1.98) | 1.53 (1.21 - 1.93) |
| Workpace (low)               | 1.67 (1.16 - 2.41) | 1.41 (1.11 - 1.79) |
| Time to tasks                | 1.32 (0.96 - 1.83) | 1.21 (0.99 - 1.48) |

|                                                        |                    |                    |
|--------------------------------------------------------|--------------------|--------------------|
| Information about decisions                            | 1.60 (1.12 - 2.28) | 1.24 (0.99 - 1.55) |
| Information to do well                                 | 1.81 (1.19 - 2.73) | 1.35 (1.04 - 1.76) |
| Recognition from management                            | 1.60 (1.10 - 2.33) | 1.49 (1.15 - 1.93) |
| Possibilities for development                          | 1.58 (1.07 - 2.33) | 1.51 (1.17 - 1.95) |
| Overall psychosocial work environment <sup>&amp;</sup> | 1.76 (1.26 - 2.45) | 1.82 (1.44 - 2.3)  |

---

\*\* ) Adjusted for age, sex, cohort, cohabiting, sector, income, vocational education, working hours, lifestyle, and previous sickness absence

<sup>&</sup>) The 'overall psychosocial work environment' represents the average normalized 0-1 score of the other seven.
